# Supplementary material for: Paracrine regulation of neural crest EMT by placodal MMP28
Source: PubMed Central journal article supplement (PMC10479893; doi:10.1371/journal.pbio.3002261), 2023-08-17
Supplement: pbio.3002261.s019.pdf [file pbio.3002261.s019.pdf]

S1\_raw\_images

## **Paracrine regulation of neural crest EMT by placodal MMP28**

Nadège Gougnard<sup>1,2</sup>, Anne Bibonne<sup>1</sup>, Joao Mata<sup>3</sup>, Fernanda Bajanca<sup>1</sup>, Bianka Berki<sup>1</sup>, Elias Barriga<sup>3</sup>, Jean-Pierre Saint-Jeannet<sup>2</sup> and Eric Theveneau<sup>1\*</sup>

1, Centre de Biologie du Développement (CBD), Centre de Biologie Intégrative (CBI), Université de Toulouse, CNRS, UPS, 118 route de Narbonne 31062, Toulouse Cedex 09, France.

2, New York University, College of Dentistry, Department of Molecular Pathobiology, 345E 24th street, New York NY 10010, USA.

3, Instituto Gulbenkian de Ciência, Mechanisms of Morphogenesis Lab, Oeiras, Portugal.

Corresponding author: [eric.theveneau@univ-tlse3.fr](mailto:eric.theveneau@univ-tlse3.fr)

**FIGURE 1g**

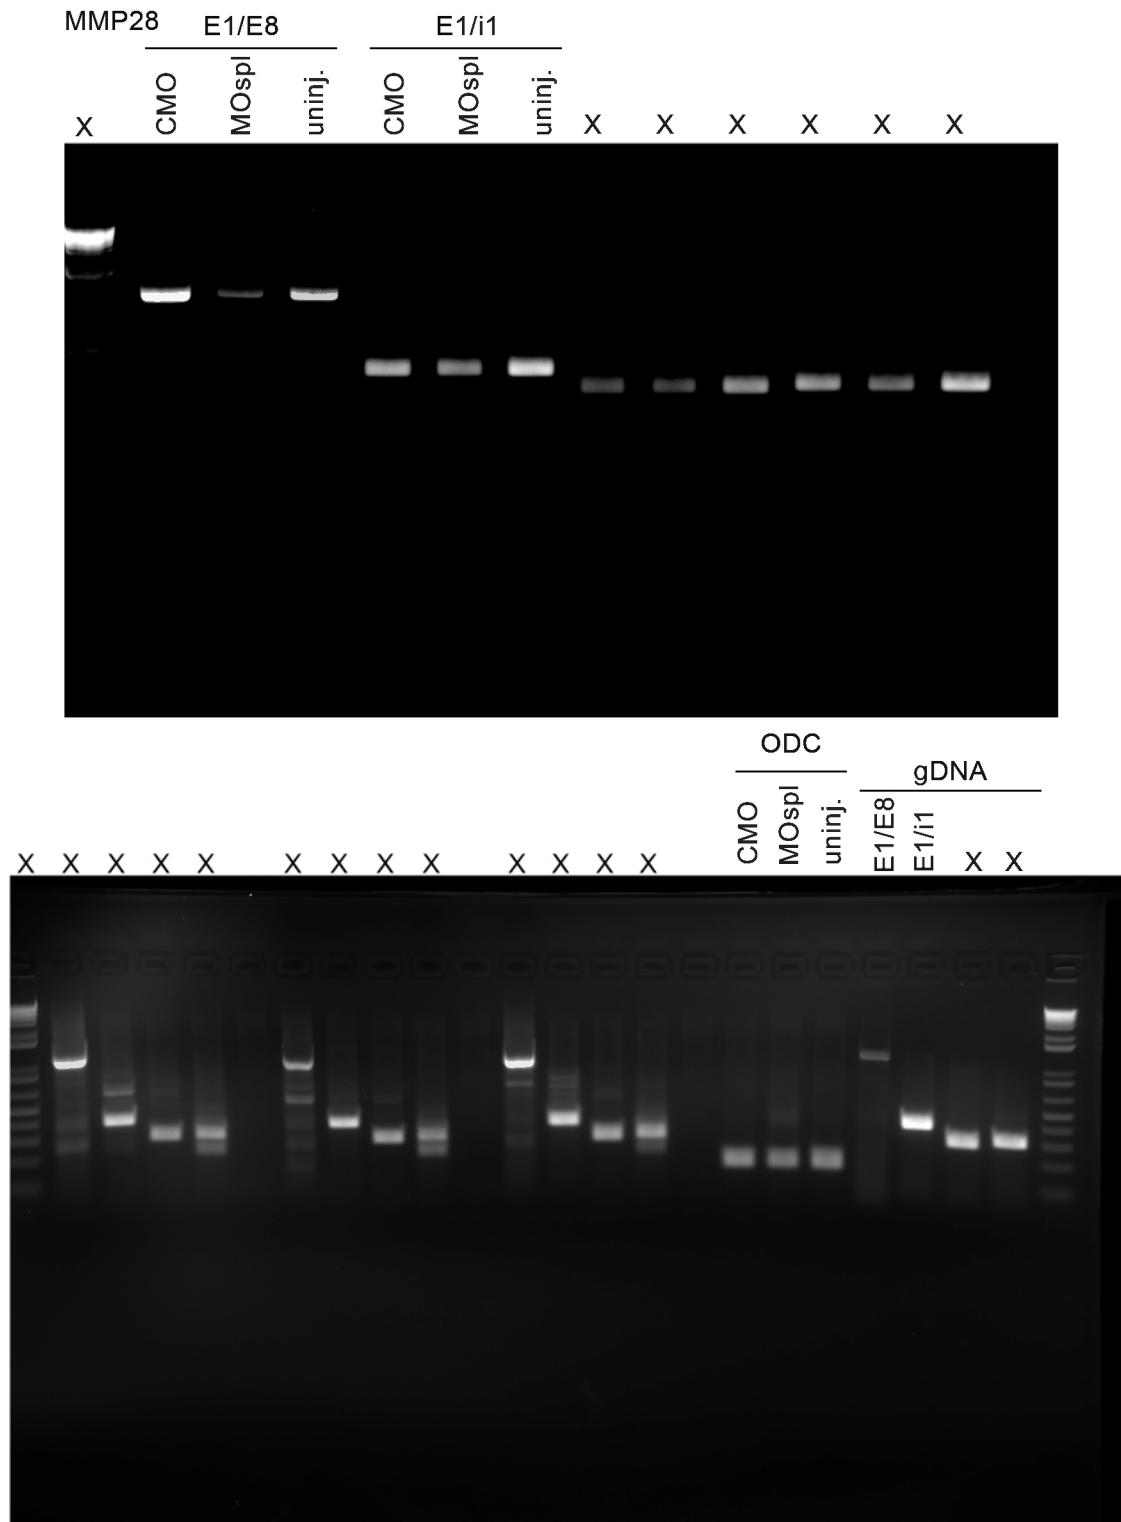

Images acquired on gel imager ChemiDoc XRS+ from Biorad

Note: to generate the blank gDNA E1/E8 panel on Figure 1g an empty part of the lane, close to the well, was cropped as the expected size of such fragment from genomic DNA is around 40 000 bp and cannot be amplified via regular PCR. Also note that a non-specific band appears at circa 1000bp.



Supporting Figure 8

panel a

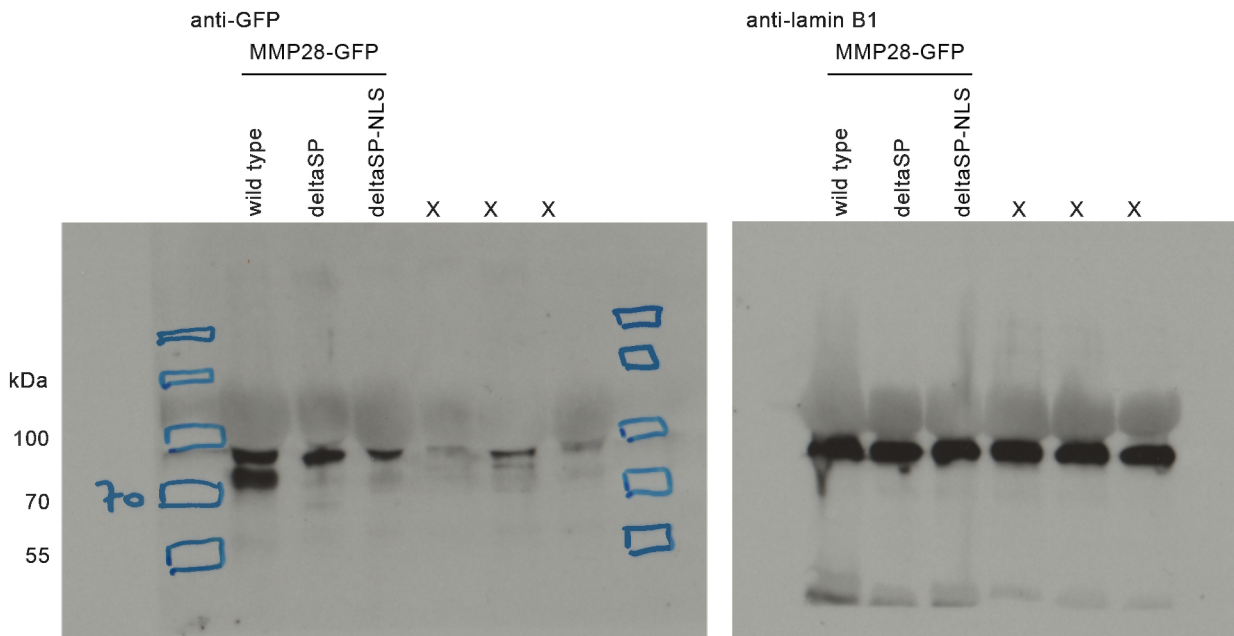

panel b

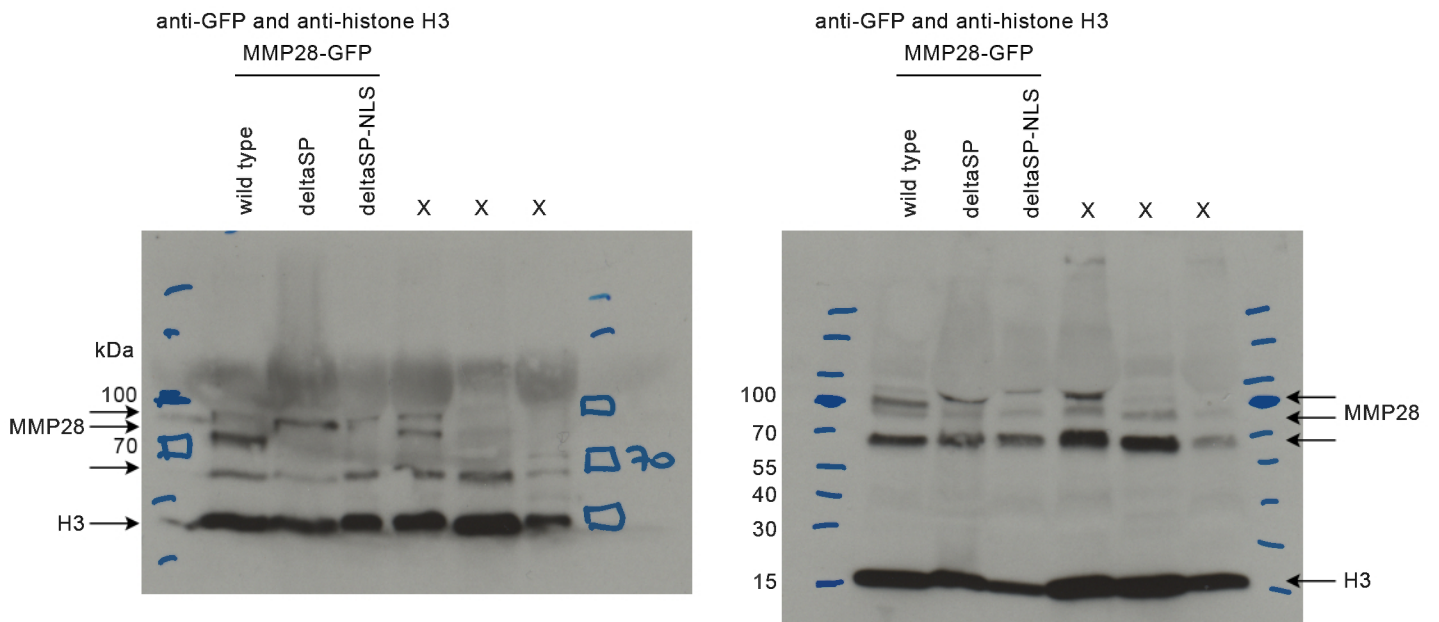

Blots were developed on film and digitalized using a high resolution scanner

**Supporting Figure 9**

**panel a**

For all conditions loading order of PCR product is from proximal to distal sites.  
Only the 3 most proximal sites were used in the analysis

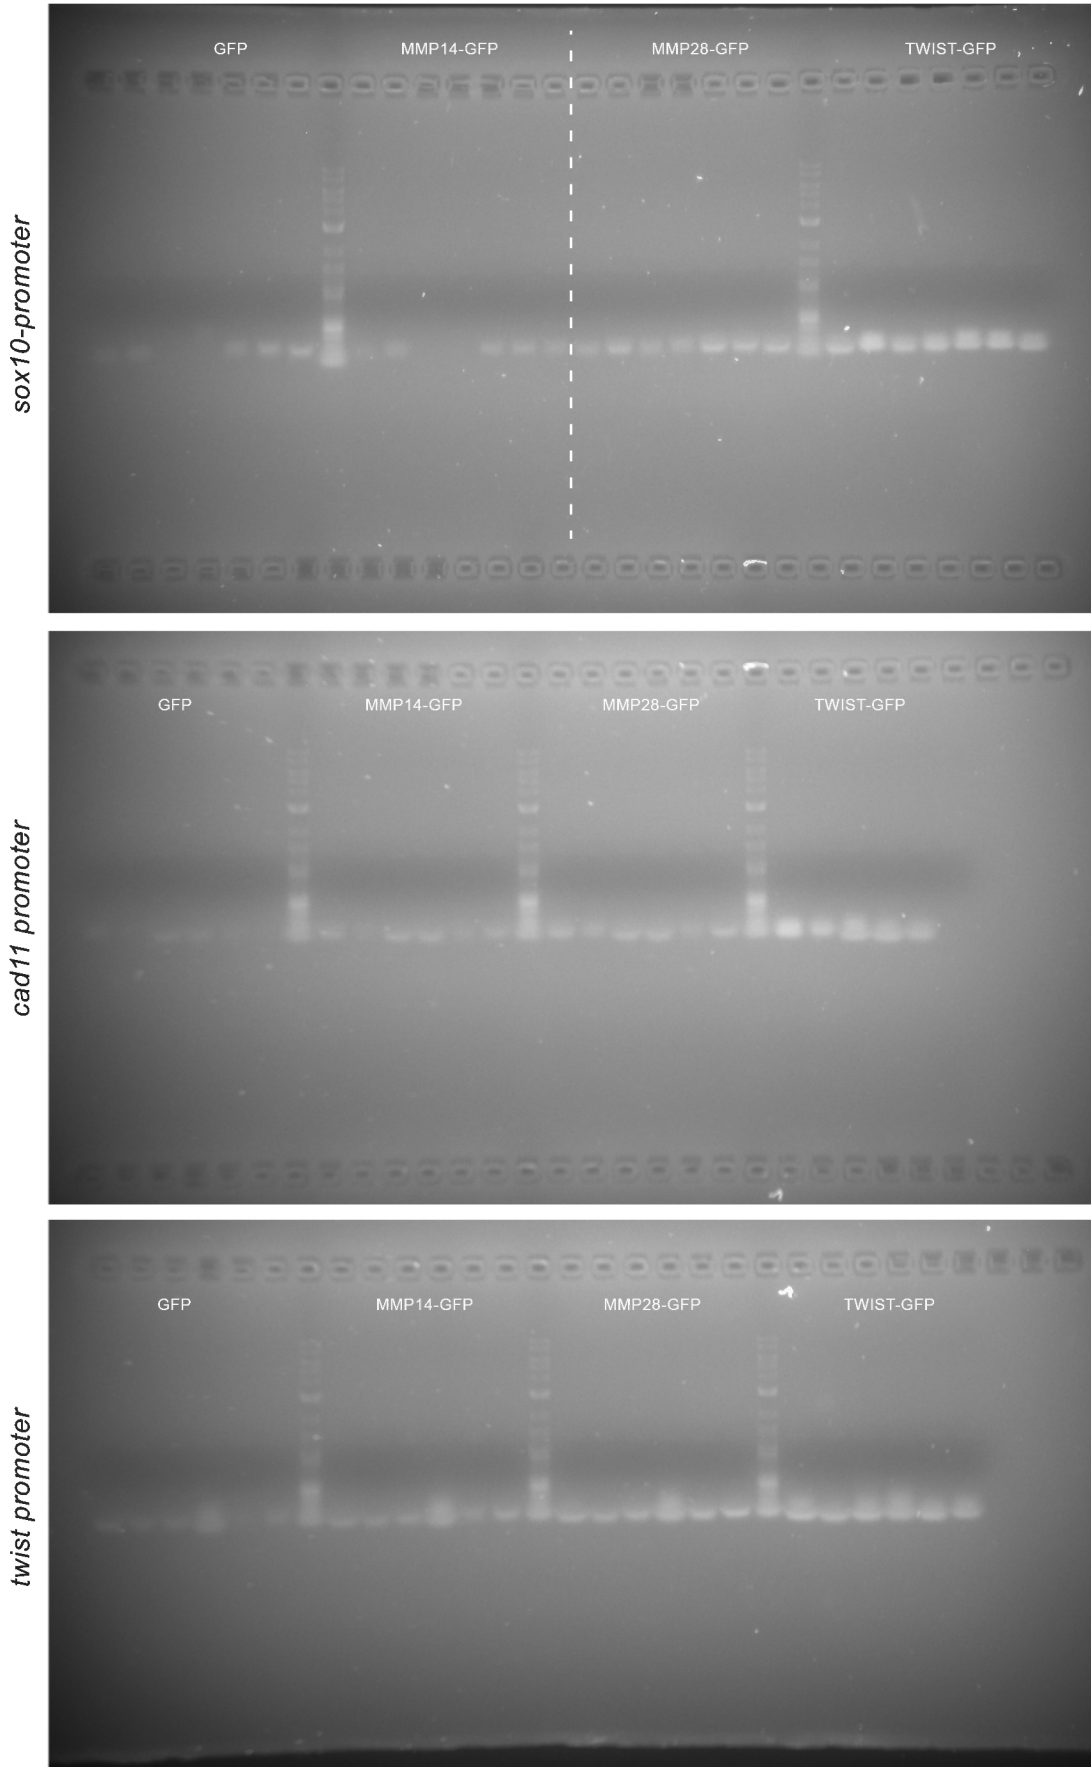

The gel is stained with XpertGreen according to manufacture protocol. Samples are mixed with 6x loading Orange-G. Imaged in Auto mode in a BioRad GelDoc Imaging System

Supporting Figure 9 (continued)

panel b

For all conditions loading order of PCR product is from proximal to distal sites.  
Only the 3 most proximal sites were used in the analysis

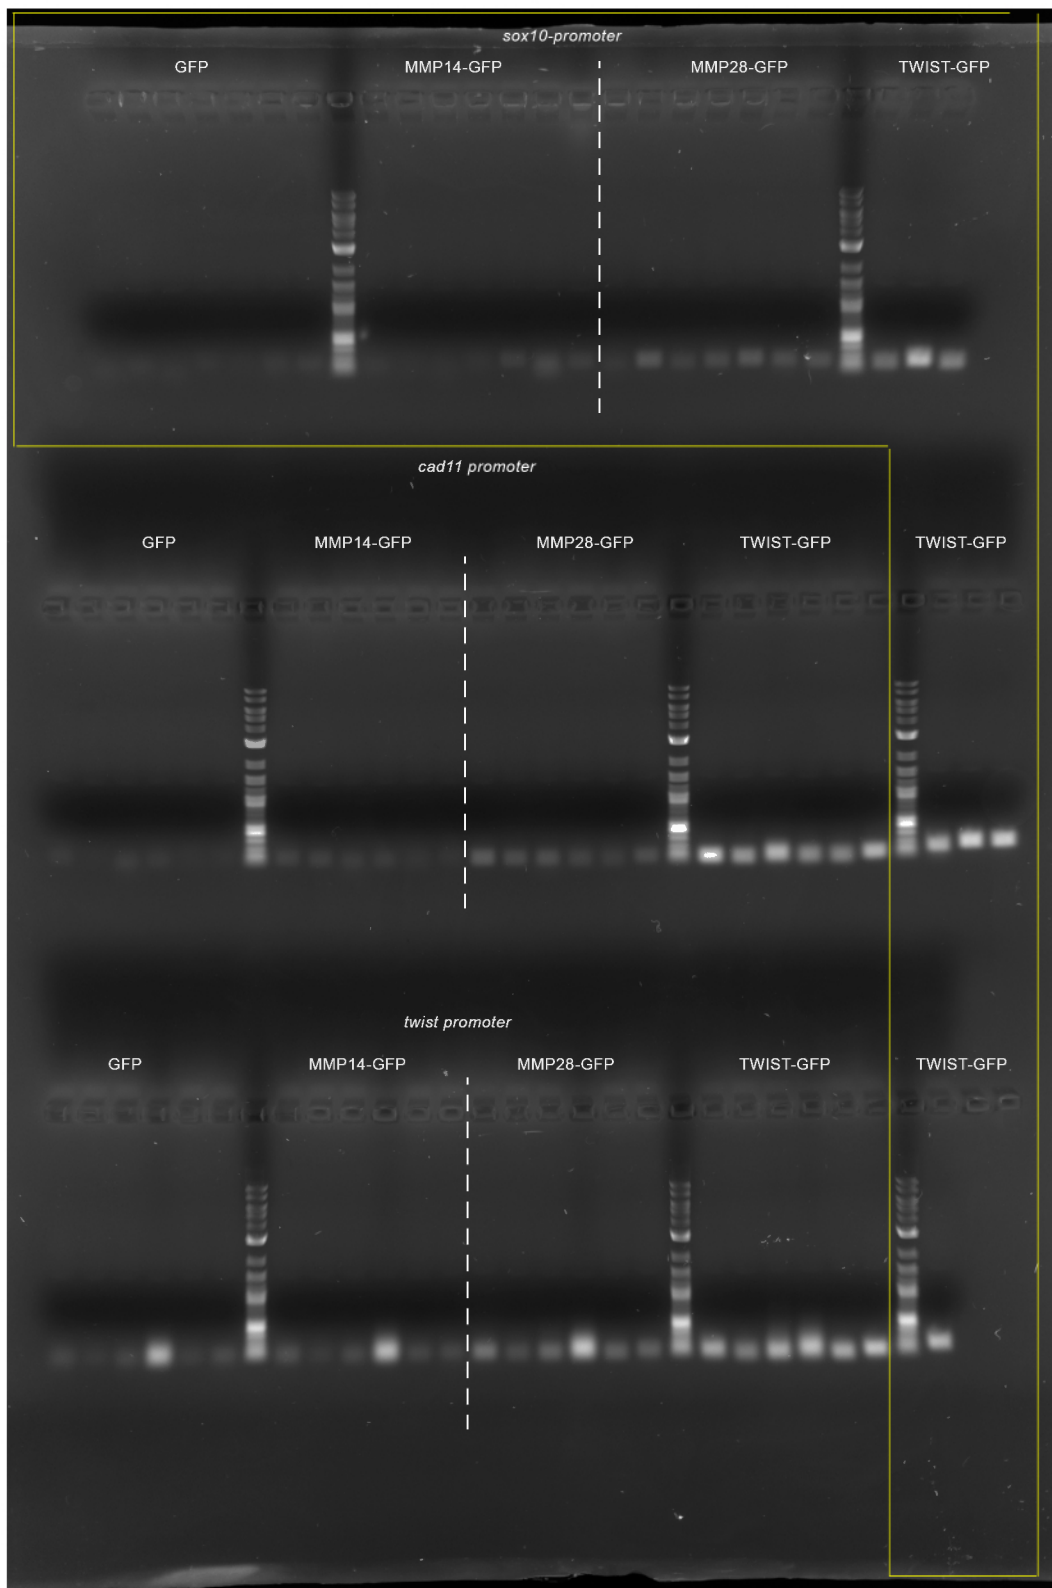

The gel is stained with XpertGreen according to manufacture protocol. Samples are mixed with 6x loading Orange-G. Imaged in Auto mode in a BioRad GelDoc Imaging System

Supporting Figure 9 (continued)

panel c

For all conditions loading order of PCR product is from proximal to distal sites.  
Only the 3 most proximal sites were used in the analysis

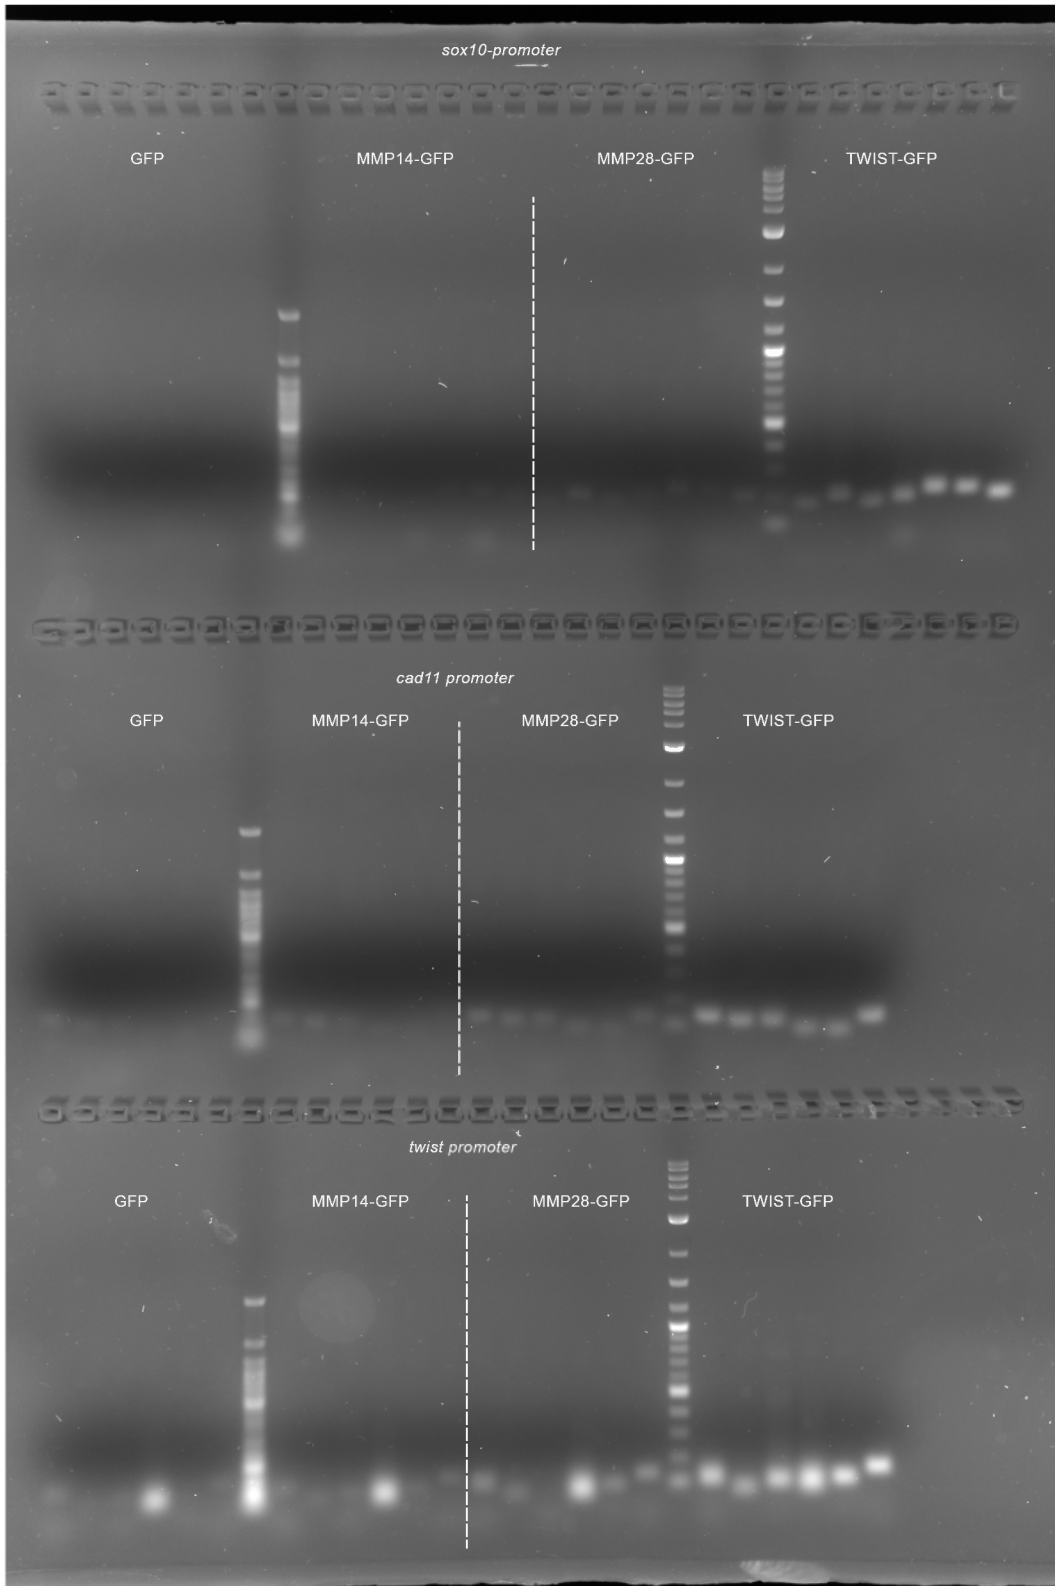

The gel is stained with XpertGreen according to manufacture protocol. Samples are mixed with 6x loading Orange-G. imaged in Auto mode in a BioRad GelDoc Imaging System

Supporting Figure 12

panel a

E-cadherin promoter domains

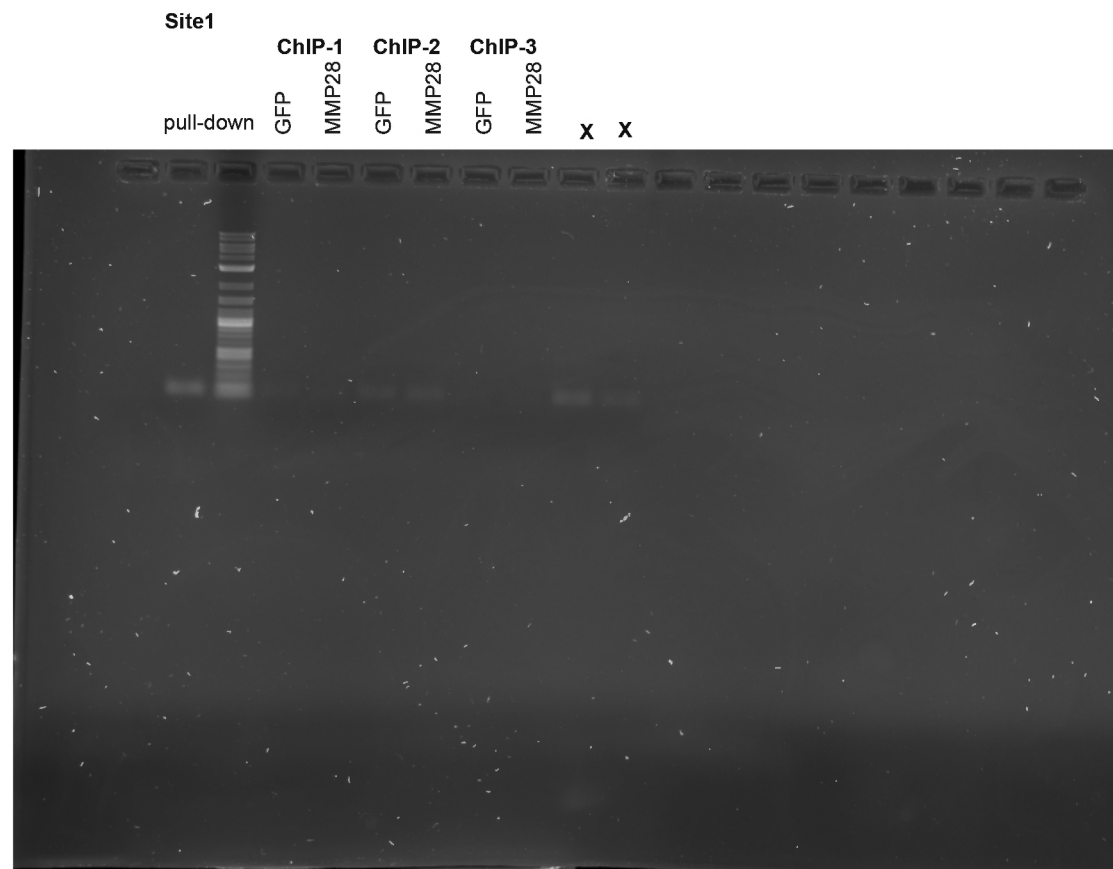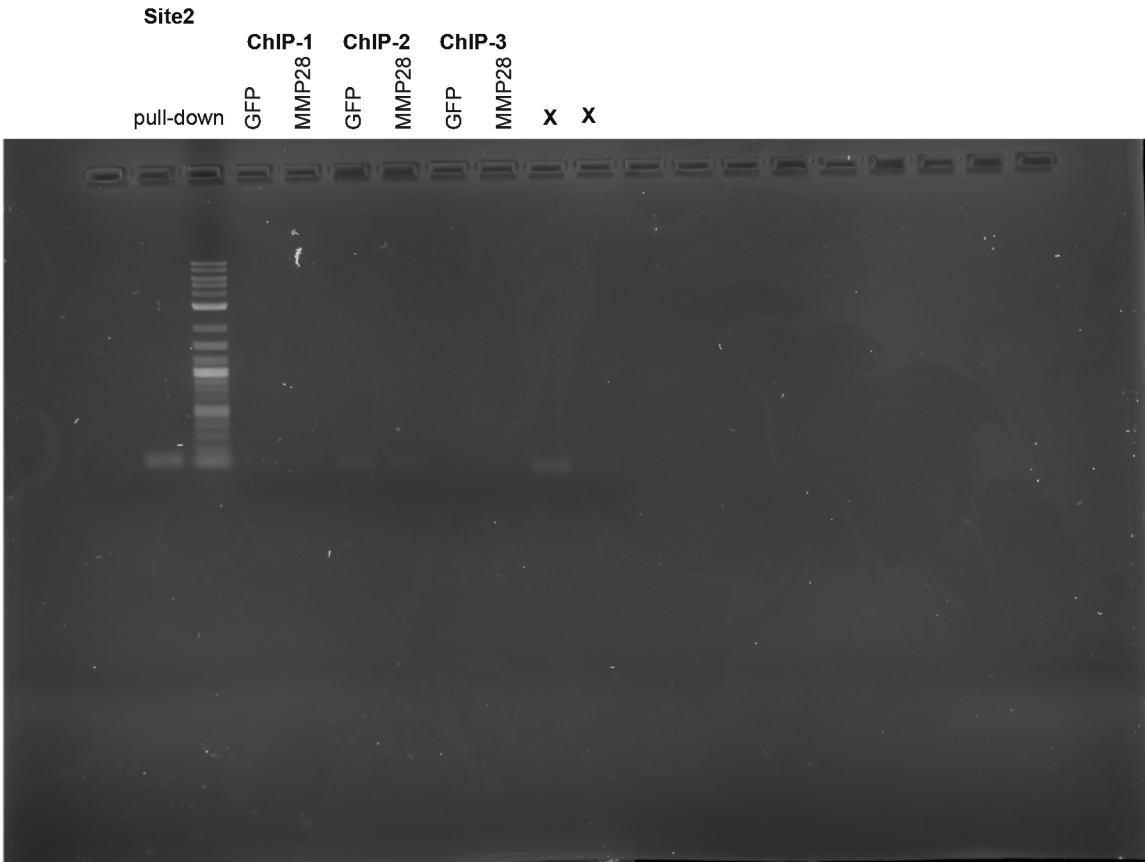

The gel is stained with XpertGreen according to manufacture protocol. Samples are mixed with 6x loading Orange-G. Imaged in Auto mode in a BioRad GelDoc Imaging System



Supporting Figure 12 (continued)

panel a

E-cadherin promoter domains

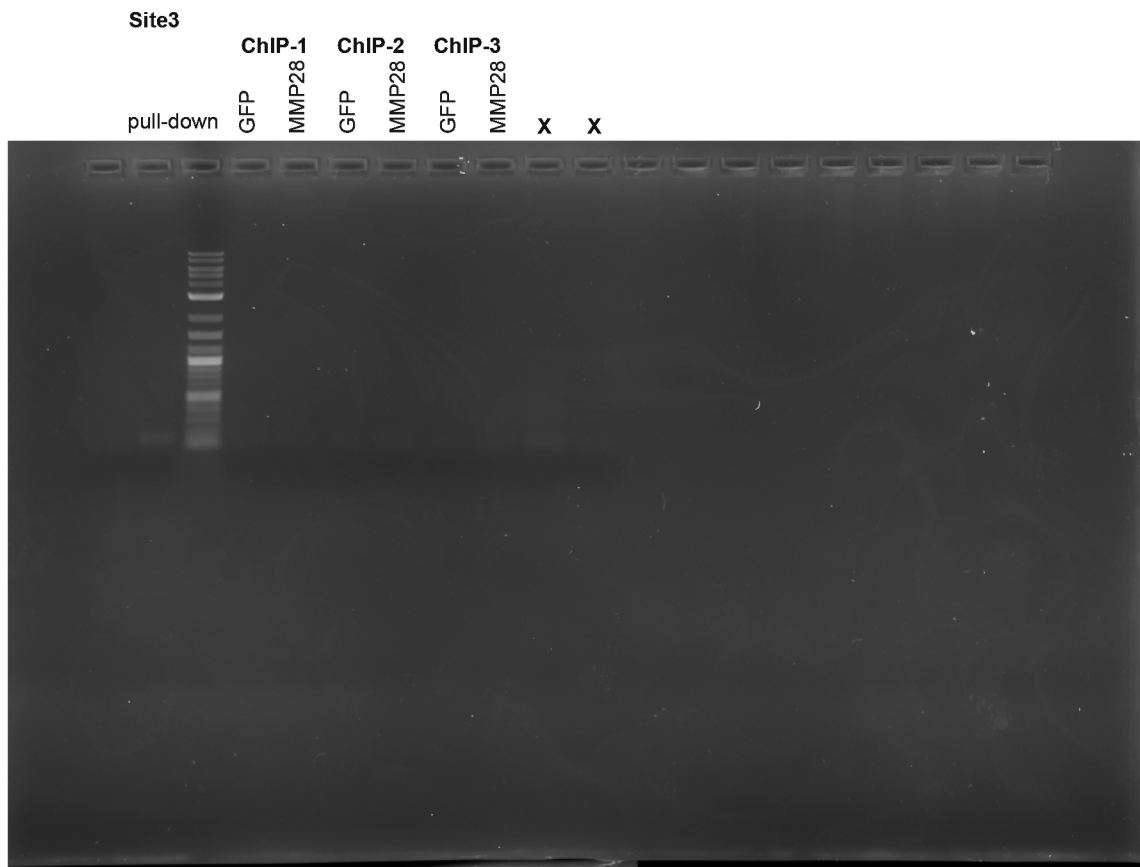

The gel is stained with XpertGreen according to manufacture protocol. Samples are mixed with 6x loading Orange-G. Imaged in Auto mode in a BioRad GelDoc Imaging System

Supporting Figure 12 (continued)

panel b

Twist promoter domains

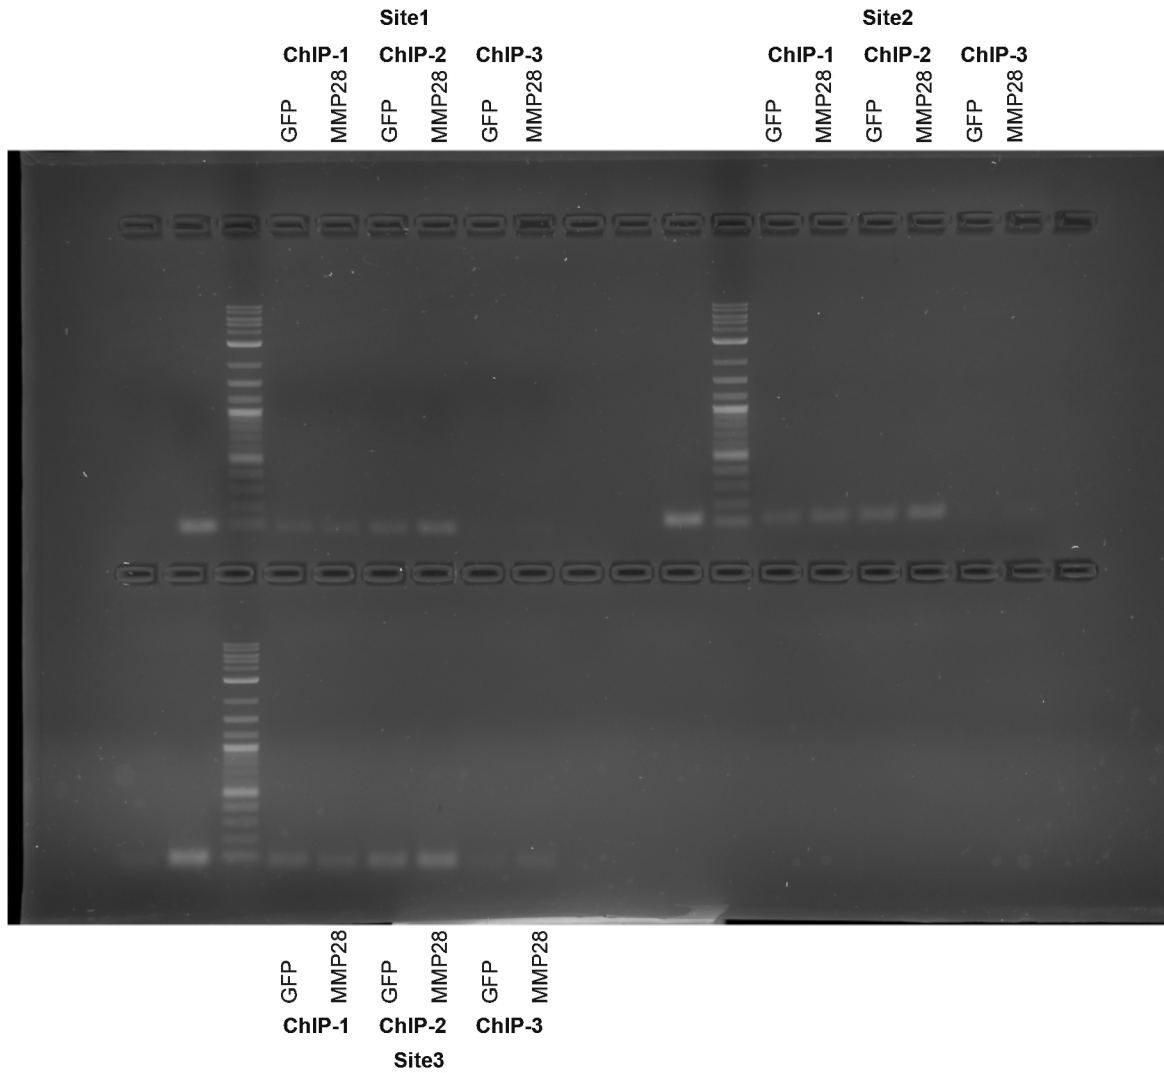

The gel is stained with XpertGreen according to manufacture protocol. Samples are mixed with 6x loading Orange-G. Imaged in Auto mode in a BioRad GelDoc Imaging System
